# Supplementary material for: Preparation of nanoscale cationic metal–organic framework Nano Mn(iii)-TP for theranostics based on valence changes
Source: Royal Society of Chemistry journal article supplement (doi:10.1039/d2tb01619b), 2022-01-01
Supplement: d2tb01619b1.pdf [file d2tb01619b1.pdf]

## Supporting Information

### **Preparation of nanoscale cationic Metal-Organic Framework Nano Mn(III)- TP for theranostic based on valence changes**

Shijiang Yu<sup>a1</sup>, Hongliu Yu<sup>a1</sup>, Panpan Si<sup>a</sup>, Zhen Wang<sup>a</sup>, Bing Wang<sup>a</sup>, Wenxin Lin<sup>a,\*</sup>

<sup>a</sup>School of Materials Science and Engineering, Zhejiang Sci-Tech University, Hangzhou,  
310018, P. R. China.

**Table S1.** Crystal data and structure refinement for Mn(II)-TP.

| Compound                          | Mn(II)-TP                                                                   |                 |
|-----------------------------------|-----------------------------------------------------------------------------|-----------------|
| CCDC no.                          | 2129399                                                                     |                 |
| Empirical formula                 | C <sub>20</sub> H <sub>16</sub> Mn N <sub>0</sub> O <sub>6</sub>            |                 |
| Formula weight                    | 407.27                                                                      |                 |
| Temperature                       | 100(2) K                                                                    |                 |
| Wavelength                        | 1.54178 Å                                                                   |                 |
| Crystal system                    | monoclinic                                                                  |                 |
| Space group                       | P 1 21/c 1                                                                  |                 |
| Unit cell dimensions              | a = 17.5204(9) Å                                                            | α = 90°.        |
|                                   | b = 6.5120(4) Å                                                             | β = 90.768(4)°. |
|                                   | c = 7.2523(4) Å                                                             | γ = 90°.        |
| Volume                            | 827.36(8) Å <sup>3</sup>                                                    |                 |
| Z                                 | 2                                                                           |                 |
| Density (calculated)              | 1.635 Mg/m <sup>3</sup>                                                     |                 |
| Absorption coefficient            | 6.825 mm <sup>-1</sup>                                                      |                 |
| F(000)                            | 418                                                                         |                 |
| Theta range for data collection   | 5.049 to 68.079°.                                                           |                 |
| Index ranges                      | -20 ≤ h ≤ 21, -7 ≤ k ≤ 7, -7 ≤ l ≤ 8                                        |                 |
| Reflections collected             | 8481                                                                        |                 |
| Independent reflections           | 1498 [R(int) = 0.0760]                                                      |                 |
| Completeness to theta = 67.679°   | 98.9 %                                                                      |                 |
| Data / restraints / parameters    | 1498 / 2 / 130                                                              |                 |
| Goodness-of-fit on F <sup>2</sup> | 1.148                                                                       |                 |
| Final R indices [I > 2σ(I)]       | R <sub>1</sub> <sup>a</sup> = 0.0608, wR <sub>2</sub> <sup>b</sup> = 0.1749 |                 |
| R indices (all data)              | R <sub>1</sub> = 0.0709, wR <sub>2</sub> = 0.1827                           |                 |
| Largest diff. peak and hole       | 0.507 and -0.627 e.Å <sup>-3</sup>                                          |                 |

$$^a R_1 = \frac{\sum ||F_o| - |F_c||}{\sum |F_o|}, \quad ^b wR_2 = \left\{ \frac{\sum [w(|F_o|^2 - |F_c|^2)^2]}{\sum [w(F_o^2)^2]} \right\}^{1/2}$$

**Table S2** The equations of DOX and MTXNa at different solvent

| Materials                      | $\lambda$ | Equation              | $R^2$   |
|--------------------------------|-----------|-----------------------|---------|
| DOX at DMA                     | 480       | $y=24.22596x+0.0058$  | 0.99877 |
| MTXNa at HCl                   | 241       | $y=35.37001x+0.00854$ | 0.99902 |
| MTXNa at PBS solution (pH 7.4) | 305       | $y=43.094x-0.01075$   | 0.99940 |
| MTXNa at PBS solution (pH 5.0) | 305       | $y=40.27614x+0.03435$ | 0.99771 |
| MTXNa at GSH solution (pH 7.4) | 302       | $y=40.17552x-0.00893$ | 0.99991 |
| MTXNa at GSH solution (pH 5.0) | 302       | $y=30.92087x+0.0289$  | 0.99952 |

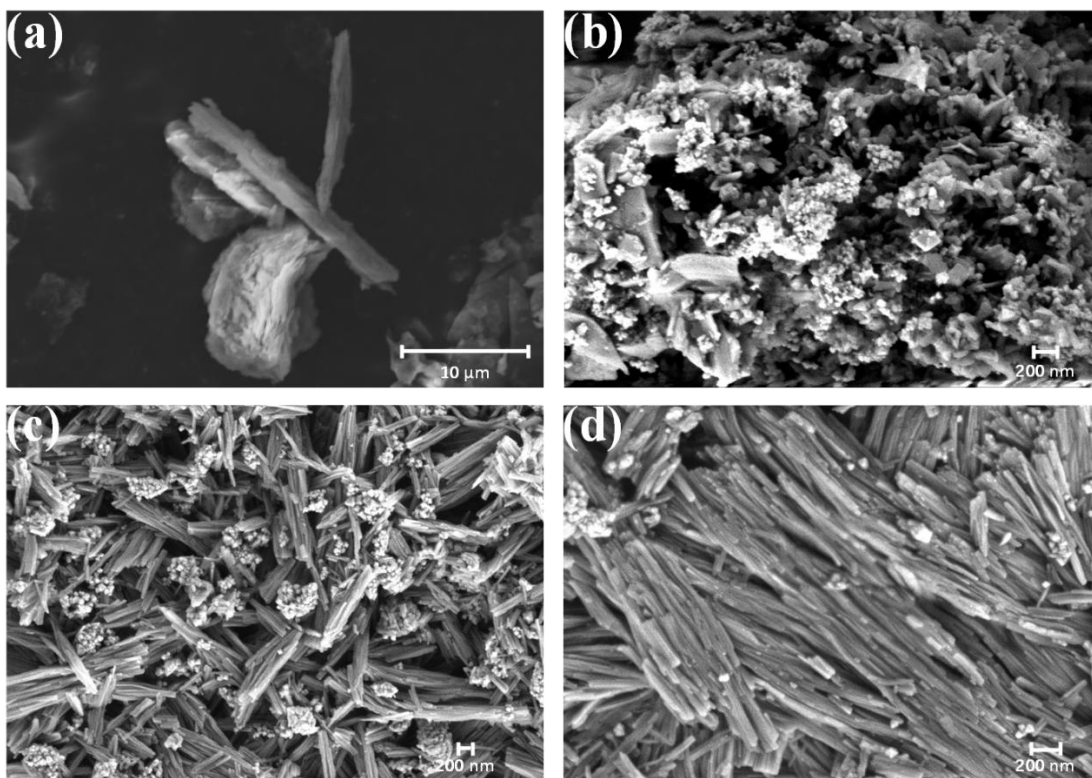

**Fig. S1** The SEM images of (a) as-synthesized Mn(II)-TP; (b) as-synthesized Mn(III)-TP; (c-d) as-synthesized Nano Mn(III)-TP.

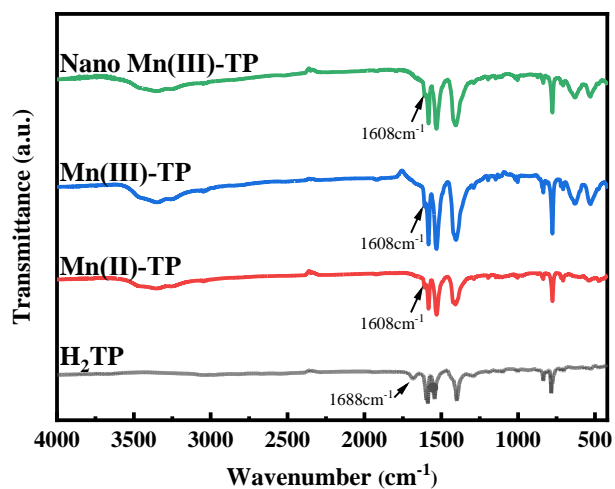

**Fig. S2** The FT-IR spectra of Mn(II)-TP, Mn(III)-TP, Nano Mn(III)-TP and H<sub>2</sub>TP.

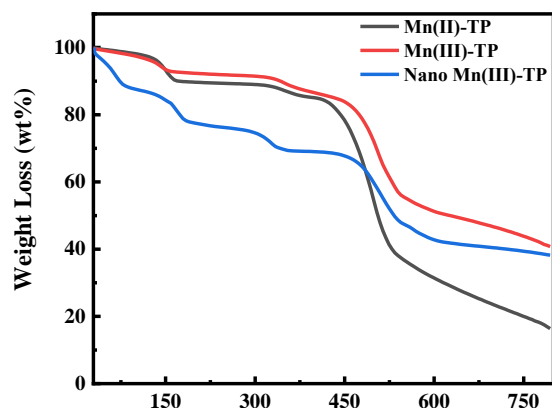

**Fig. S3** Thermogravimetric analysis of Mn(II)-TP, Mn(III)-TP and Nano Mn(III)-TP.

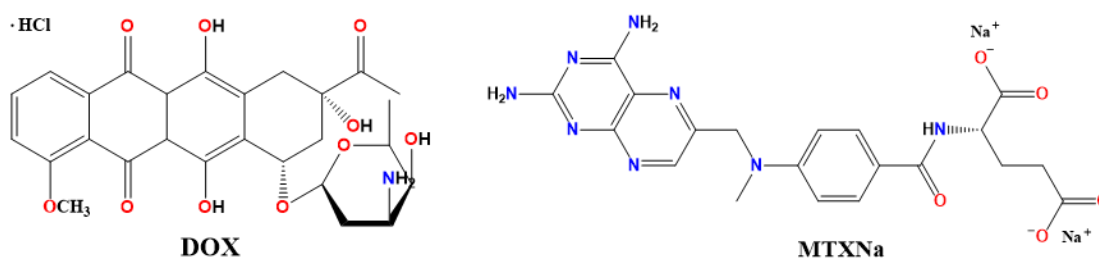

**Fig. S4** The chemical structures of drug DOX and MTXNa.

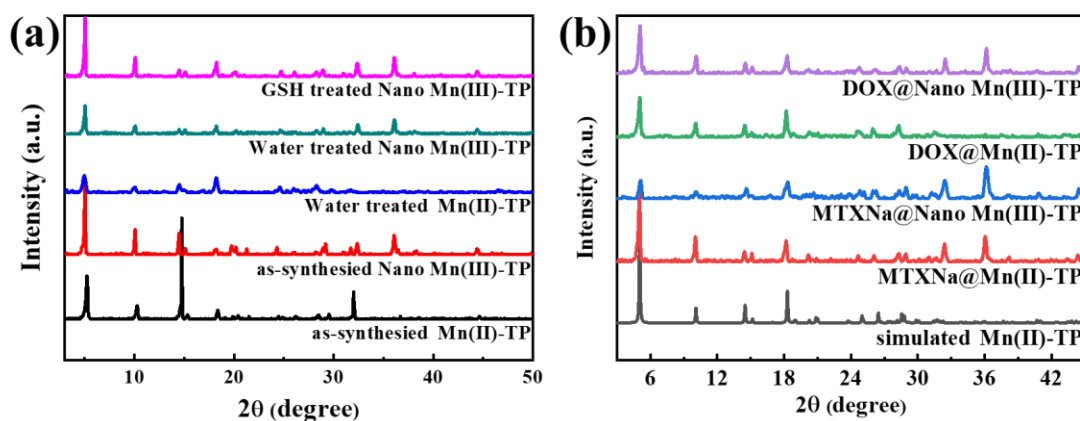

**Fig. S5** (a) The PXRD patterns of as-synthesized Mn(II)-TP and Nano Mn(III)-TP, water treated Mn(II)-TP and Nano Mn(III)-TP, GSH treated Nano Mn(III)-TP; (b) The PXRD patterns of simulated Mn(II)-TP, Mn(II)-TP and Nano Mn(III)-TP loaded with MTXNa and DOX.

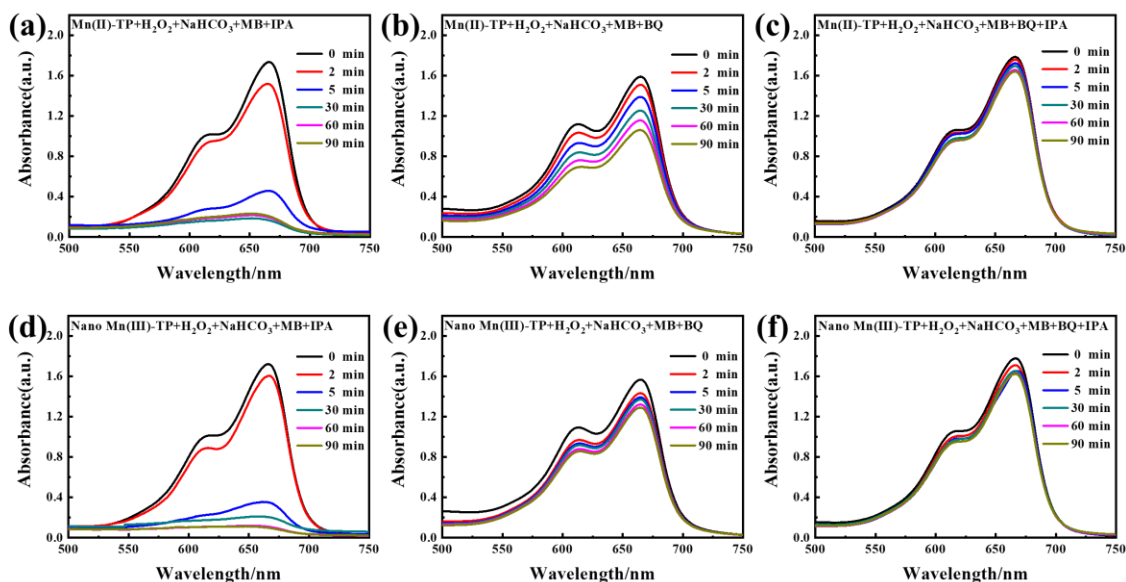

**Fig. S6** The UV-Vis absorption spectra of MB solutions containing (a) Mn(II)-TP with IPA; (b) Mn(II)-TP with BQ; (c) Mn(II)-TP with BQ and IPA; (d) Nano Mn(III)-TP with IPA; (e) Nano Mn(III)-TP with BQ; (f) Nano Mn(III)-TP with BQ and IPA.

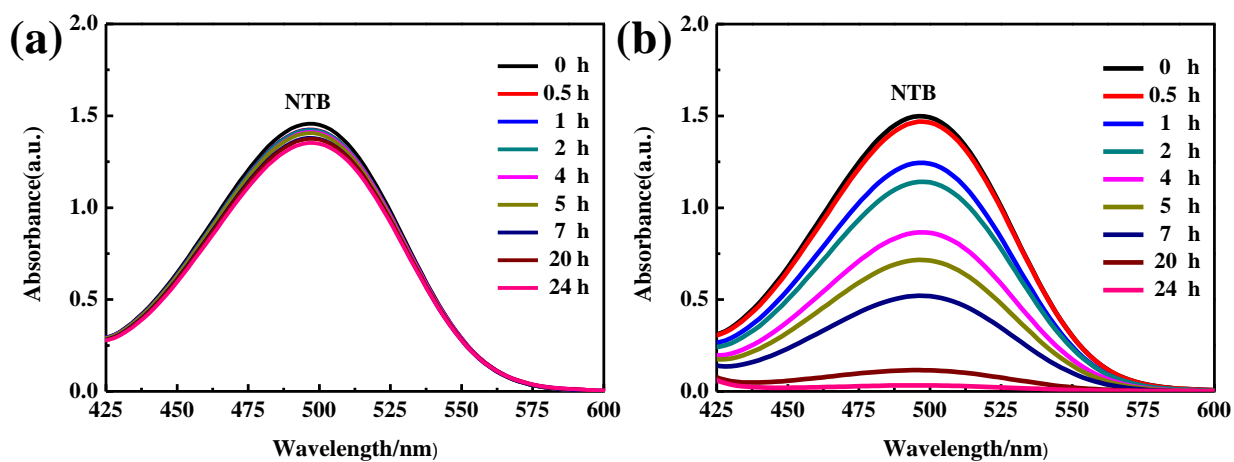

**Fig. S7** (a) The UV-Vis absorption spectra of NTB from pure GSH solution; (b) GSH solution after adding Nano Mn(III)-TP.

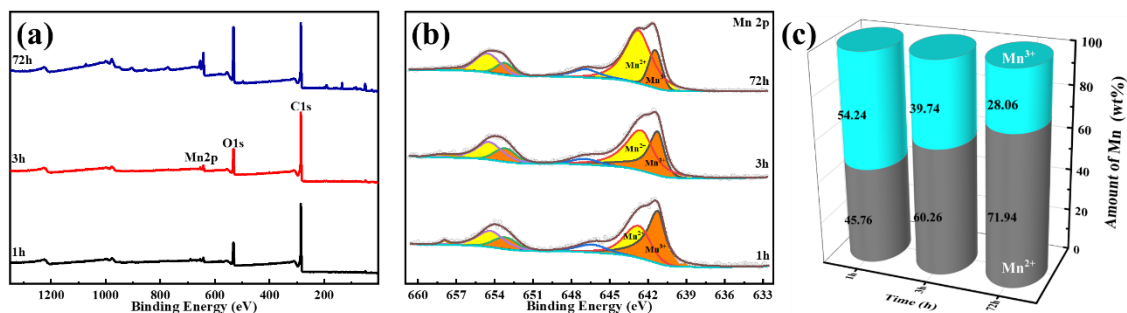

**Fig. S8** (a) XPS spectra of Nano Mn(III)-TP treated by GSH for different time; (b) Mn 2p spectrum of Nano Mn(III)-TP treated by GSH for different time; (c) The Mn(II) and Mn(III) contents of Nano Mn(III)-TP treated by GSH for different time.

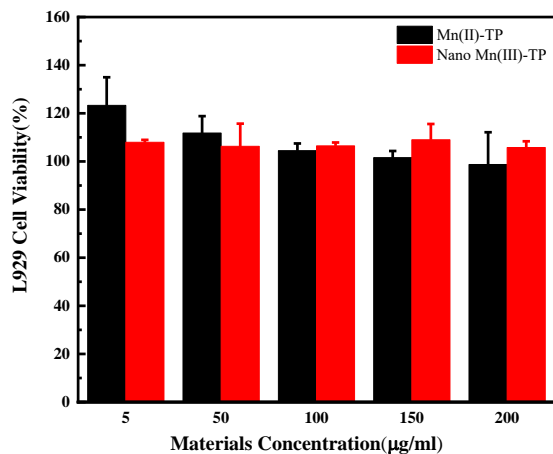

**Fig. S9** L929 cell viability after culturing with Mn(II)-TP and Nano Mn (III)-TP.
